# Supplementary material
Source: PubMed Central journal article supplement (PMC11113845)

# Supplementary Figure 2

TEB

Ducts

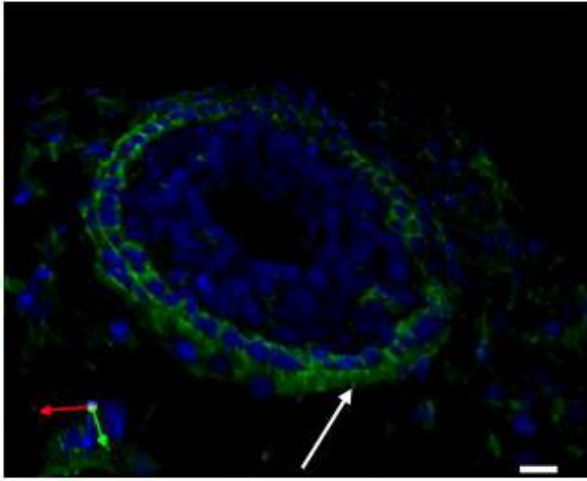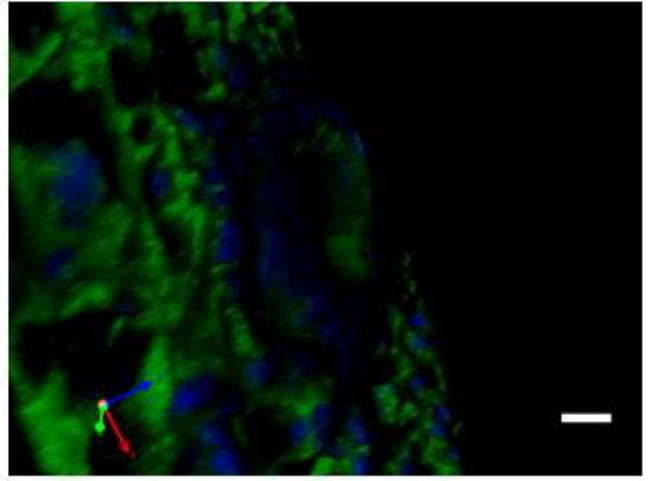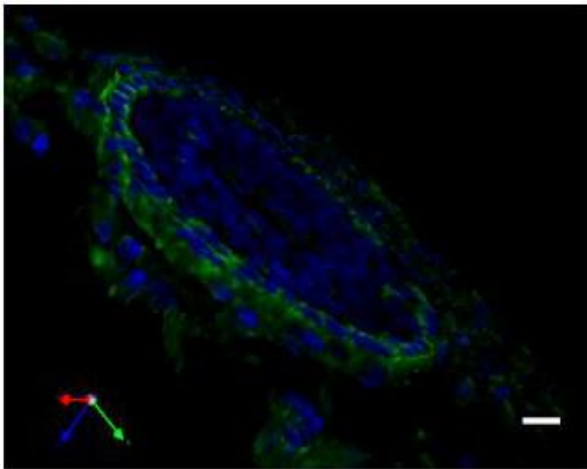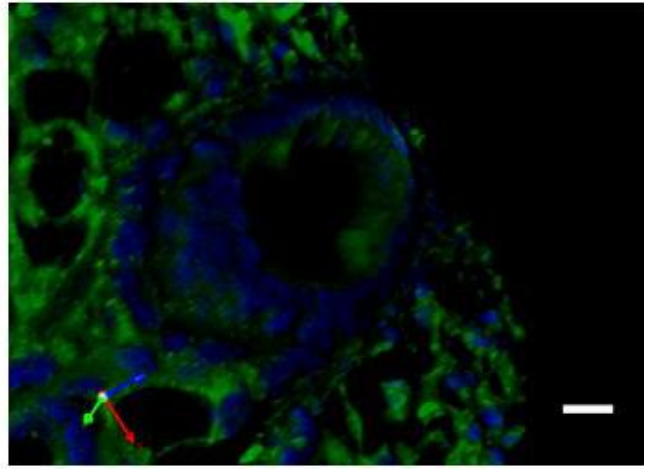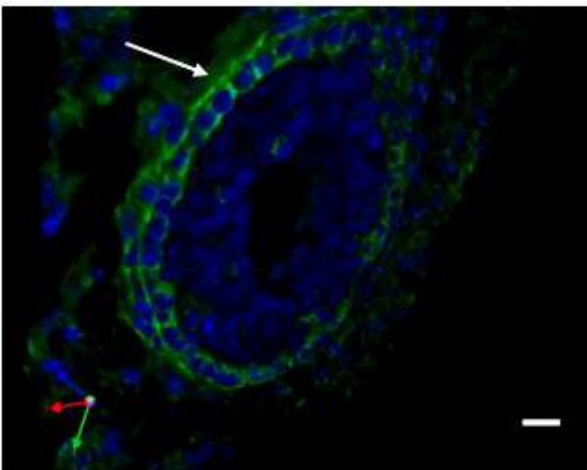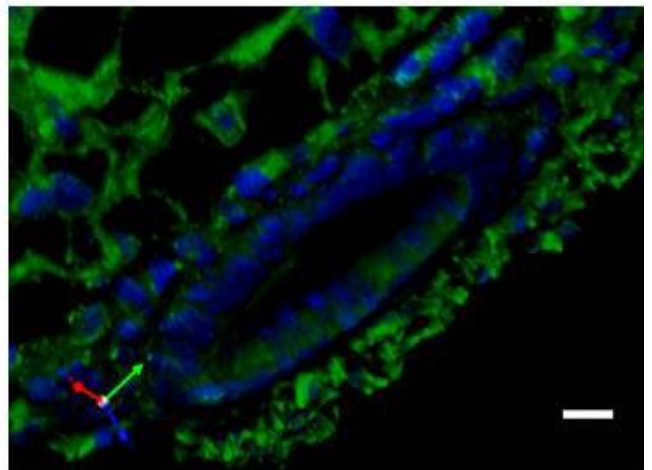

Supplement: 18_2014_1577_MOESM2_ESM.pdf [file 18_2014_1577_MOESM2_ESM.pdf]

# Supplementary Figure 3

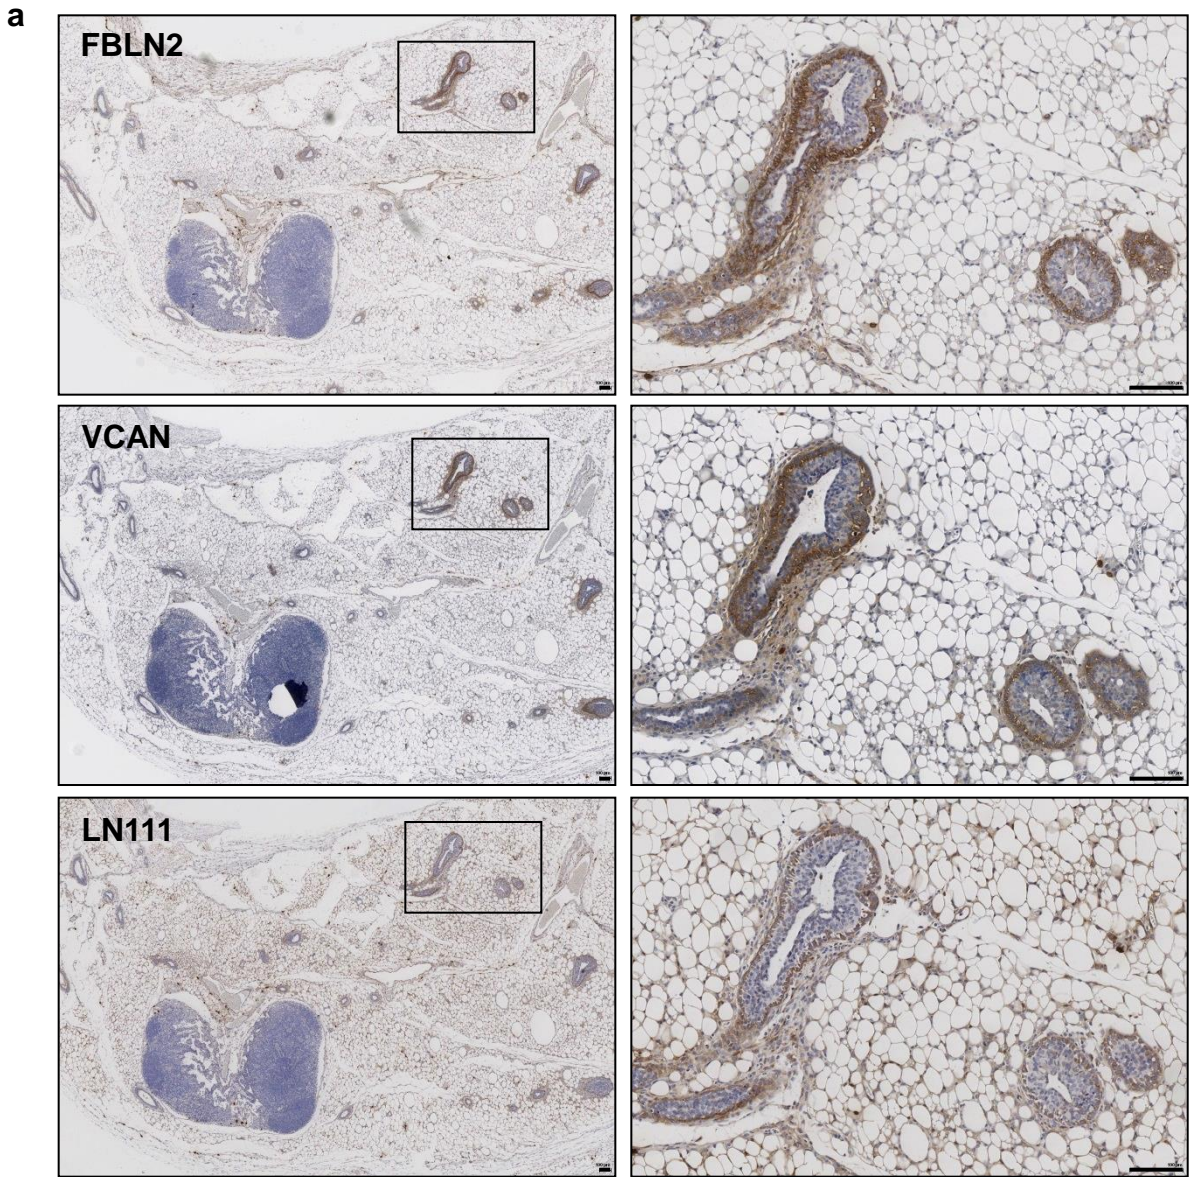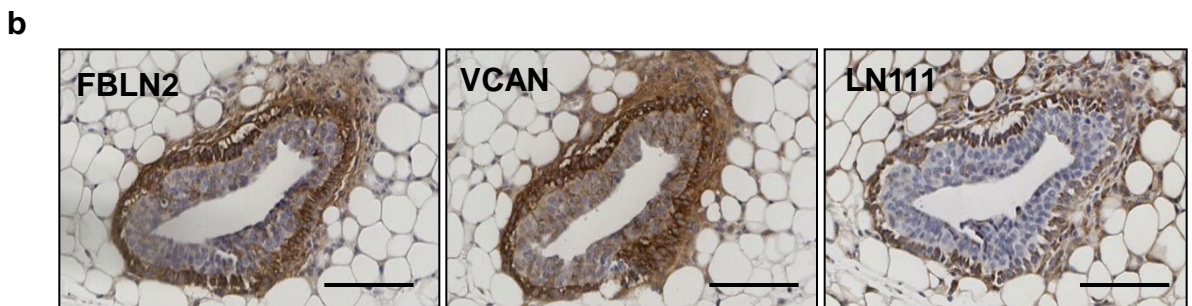

Supplement: 18_2014_1577_MOESM3_ESM.pdf [file 18_2014_1577_MOESM3_ESM.pdf]

# Supplementary Figure 5

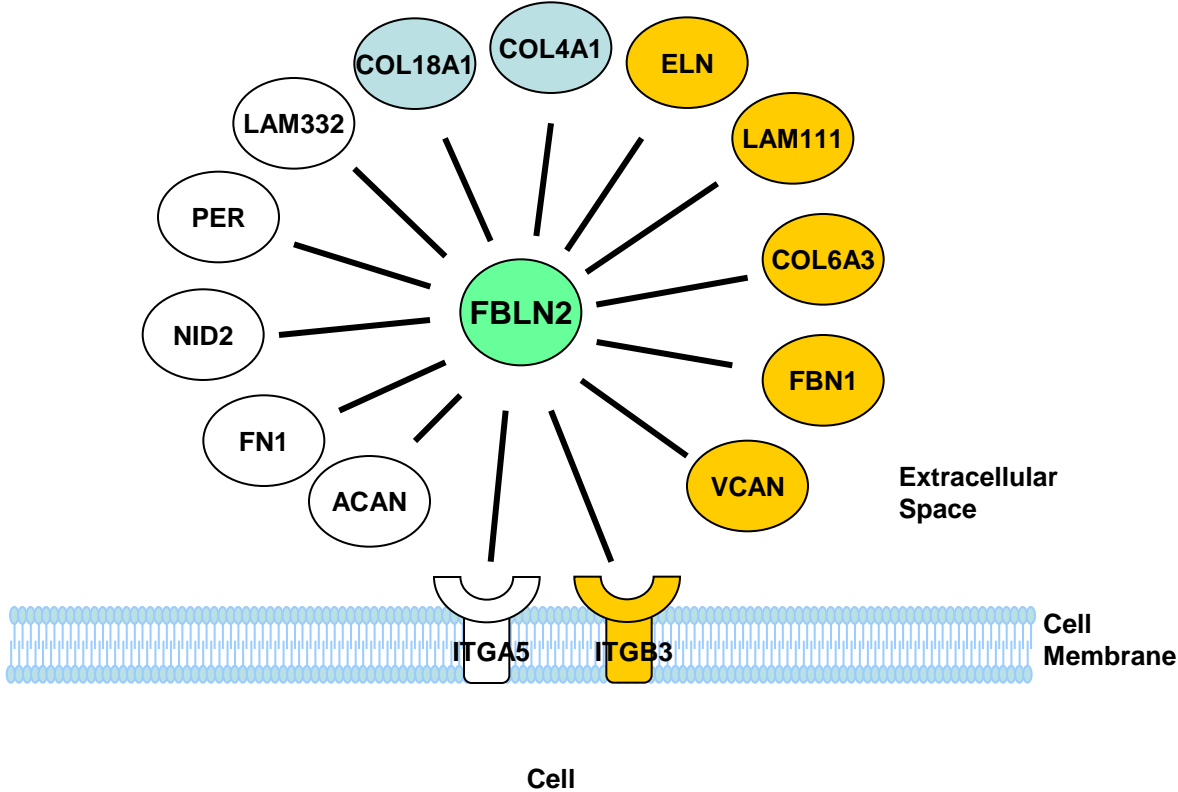

Supplement: 18_2014_1577_MOESM5_ESM.pdf [file 18_2014_1577_MOESM5_ESM.pdf]
